# Supplementary material for: Home visits by community health workers for pregnant mothers and newborns: coverage plateau in Malawi
Source: PubMed Central journal article supplement (PMC6596344; doi:10.7189/jogh.09.010808), 2019-06
Supplement: jogh-09-010808-s001.pdf [file jogh-09-010808-s001.pdf]

Online Supplementary Document

**Table S1. Health Surveillance Assistant (HSA) Tasks for Community Based Maternal Newborn Care (CBMNC) in Malawi**

1. **Identify pregnant women in the community** so that HSA can make home visits during pregnancy and in the first days after birth for the greatest impact
2. **Make two home visits to all pregnant women in the community:**
  - First pregnancy visit** — as early in pregnancy as possible —
    - To encourage the pregnant woman to go for early antenatal care
    - To encourage her to learn her HIV status so that she can take action to best protect her health and protect her baby from HIV
    - To promote birth in a health facility
    - To help prepare for birth
    - To teach home care for the pregnant woman.
  - Second pregnancy visit** — about 2 months before delivery —
    - To review antenatal care visits, plans for birth, and home care for the pregnant woman.
    - To encourage the family to follow optimal newborn care practices immediately after birth.
    - If the woman has HIV, to check that she is taking ARVs every day and will continue through delivery and breastfeeding.
3. **Make 3 home visits after birth** for all mothers and babies, regardless of place of birth.
  - First postnatal visit** — on Day 1 after birth —
    - To assess the mother and baby for signs of illness, weigh the baby, and help the mother with early and exclusive breastfeeding and keeping the baby warm.
    - If the mother has HIV, to check that the mother is taking her ARVs and giving the baby the ARV syrup at the same time every day.
  - Second postnatal visit** — on Day 3 after birth —
    - To assess for signs of illness, help the mother to sustain breastfeeding and prevent breastfeeding problems, and advise on optimal care for the

*mother and her baby.*

- *If the mother has HIV, to check that the mother is taking her ARVs and giving the baby ARV syrup at the same time every day. (NOTE: If the first postnatal visit is delayed until day 2 for some reason, this visit should still be made on day 3.)*

**Postnatal visit 3** — on Day 8 after birth —

- *To assess for signs of illness, and advise on optimal care beyond the first week of life.*
- *If the mother has HIV, to encourage her to continue taking her ARVs and giving the baby the ARV syrup at the same time every day; and to bring the baby to the health facility when the baby is 4–6 weeks old, so that the baby can be tested for HIV and started on cotrimoxazole. (NOTE: If the second postnatal visit is delayed for some reason, this visit should still be made on day 8.)*

**4. Make two extra home visits after birth for small babies (birth weight less than 2.5 kg) — on day 2 and day 14 — so that the HSA can provide the extra care that small babies need**

**5. Make a follow-up visit for a baby who is referred to a health facility for illness**

**Source: Malawi MOH. *Caring for the Newborn at Home: Participant Manual.* Lilongwe, 2014**
